# Supplementary material for: Lamivudine/dolutegravir dual therapy in HIV-infected, virologically suppressed patients
Source: BMC Infect Dis. 2017 Mar 16;17:215. doi: 10.1186/s12879-017-2311-2 (PMC5356275; doi:10.1186/s12879-017-2311-2)
Supplement: Additional file 1: — DTG-3TC Anonymous db for paperR1. (XLSX 82.1 kb) [file 12879_2017_2311_MOESM1_ESM.xlsx]

## Sheet: Foglio1
PAZIENTE_ID	NRTI	NN	PI	INI	cost	TERAPIApre	FR	coinfezione	DataHaart	totHAART	HAARTpre	dataHAARTpre	line	BLD	lastposVL	bone	renal	cv	diabetes	met	SNC	hepato	other	reasonswitch	co-morbidities	co-therapies	Ndrugs	VLpreHAART	enrollment	CD4b	CD8B	CD4CD8b	VLb	CRb	CTb	HDLb	LDLb	Tb	CD4-2	CD8-2	CD4CD8-2	VL-2	CR-2	CT-2	HDL-2	LDL-2	T-2	CD4-6	CD8-6
1	TDF	RPV			21.695	EVIPLERA	ETERO	NO	2013-02-01	2.58082	24.7333	2013-08-20	3	23.7333	2013-09-19	1		1						lab	firillazione atriale osteoporosi	vitD ASA	2	56350	2015-09-01	522	502	1.03984	1	0.89	199	45	130	162	624	511	1.22114	1	0.96					663	521
2	TDF	RPV			21.695	EVIPLERA	ETERO	NO	2013-07-18	1.75616	10.4333	2014-06-11	2	16.5667	2013-12-09					1				lab	dislip	vitD	1	11000000	2015-04-20	1649	1204	1.3696	1	1.9	212	30	161	210	2196	997	2.20261	1	1.16	222	32	125	322	2196	997
3	ABC		ATV		26.204	KIV+ATV/rtv	ETERO	NO	2006-06-28	8.84384	85.2	2008-04-30	4	105.567	2006-08-28		1			1				lab	IRC dislip	crestor fulcro	2	45499	2015-04-30	853	1425	0.598596	1	2.06	335	47	223	323	811	1364	0.594575	1	2.2	183	51	97	173	805	1259
4	TDF	RPV			21.695	EVIPLERA	ETERO	NO	2009-07-28	5.83014	24.4	2013-05-24	3	23.4667	2013-06-21	1								cdis lab	osteoporosi	prava vitD	2	46351	2015-05-26	788	487	1.61807	26	1.09	186	53	109	119	1045	547	1.91042	1	1.28	205	65	112	140	1004	568
5	TDF	EFV			21.777	ATRIPLA	OMO	NO	2014-05-02	0.742466	9.03333	2014-05-02	1	8.9	2014-05-06								1	aes	malassorbimento	vitB12	1	65000	2015-01-28	494	1439	0.343294	5	1	145	43	77	125	1040	1787	0.581981	1	1.15	176	61	95	99	957	1580
6	TDF			DTG	31.13	TRU+DTG	ETERO	NO	2010-06-23	5.53973	2.23333	2015-10-30	2	65.1333	2010-08-30								1	lab	reflusso gastrico enterite cronica	esomeprazolo	1	632900	2016-01-05	569	881	0.645857	1	0.67	195	38	111	125	620	918	0.675381	10	0.87					740	1190
7	TDF	NVP			20.898	TRU+NVP	ETERO	NO	2010-11-03	4.40822	53.6333	2010-11-03	1	51.7333	2010-12-30	1								cdis	osteoporosi	vitD	1	8384	2015-03-31	526	600	0.876667	1	0.63	183	83	85	71	538	459	1.17211	1	0.78	183	83	85	71	813	663
8	TDF	EFV			21.78	ATRIPLA	ETERO	NO	1995-12-05	19.1836	78	2008-09-09	4	53.0667	2010-09-27			1	1	1				lab	diabete IMA ipert	ASA aprovel PPI stat ramipril bisoprololo vitD	7		2015-02-05	628	580	1.08276	1	1.08	120	38	70	215	602	577	1.04333	16	1.08	115	39	48	140	397	421
9	TDF	EFV			21.78	ATRIPLA	TD	HCV	1995-05-23	20.1945	81.8333	2008-11-06	5	201.4	1999-01-11							1	1	ddi	HCV cirrosi gastrite	harvoni copegus calcio vitD PPI	6		2015-07-28	597	338	1.76627	1	0.64	185	48	83	160	566	383	1.47781	10	0.62	173	49	100	118	429	214
10	TDF			RAL	32.002	TRU+RAL	OMO	NO	2004-05-13	10.7562	78	2008-09-15	5	111.8	2005-12-06	1							1	cdis	osteoporosi colite ulcerosa	vitD	1	319836	2015-02-11	854	116	7.36207	1	0.87	218	57	137	120	1029	1321	0.778955	1	0.97	189	42	113	169	1029	1321
11	TDF		ATV		26.559	TRU+ATV/rtv	OMO	NO	2012-08-29	2.77534	33.7667	2012-08-29	1	30.5	2012-12-05									lab		omega 3 vitD	2	137300	2015-06-08	831	1693	0.490845	1	1.15	182	37	120	121	869	1731	0.502022	1	1.24	221	50	147	119	869	1731
12	TDF		ATV		26.559	TRU+ATV/rtv	ETERO	HCV	2006-05-15	9.66575	82.1	2009-04-14	3	115.467	2006-07-18							1		ddi	HCV cirrosi	harvoni copegus	3	87783	2016-01-11	728	510	1.42745	1	0.85					608	361	1.68421	1	0.99
13	TDF	RPV			21.695	EVIPLERA	ETERO	NO	2013-10-28	1.98082	24.1	2013-10-28	1	24.7	2013-10-10		1							cdis	IRC		0		2015-10-21	785	817	0.960832	1	1.29	221	86	121	68	951	1171	0.812126	1	1.25	252	90	143	94	1072	1044
14	TDF			RAL	32	TRU+RAL	ETERO	HCV	2000-12-23	14.6411	2.96667	2015-05-14	5	32.0333	2012-12-23							1		ddi	cirrosi	daklinza sovaldi	2		2015-08-11	762	996	0.76506	1	0.65	170	37	84	99	1024	1385	0.73935	24	0.84					897	1117
15	TDF	EFV			21.777	ATRIPLA	ETERO	NO	2011-02-17	4.27123	51.9667	2011-02-17	1	45.1667	2011-09-09			1					1	lab	basedow iperT	antiipert vitD	3	177700	2015-05-26	750	642	1.16822	1	0.97	193	48	128	82	817	518	1.57722	1	1.13	193	54	123	78	909	586
16	ABC	EFV			20.421	KIV+EFV	ETERO	NO	2007-06-06	8	23.3333	2013-07-04	3	94.0333	2007-09-13			1						aes	ipertensione	vitD antiipert	3	67570	2015-06-04	425	911	0.46652	1	0.94	182	46	105	152	331	920	0.359783	6	1					405	1153
17	ABC	RPV			20.965	KIV+RPV	OMO	NO	2013-05-27	1.59452	17.0667	2013-08-05	6	18.4667	2013-06-24	1					1		1	cdis	ileite psicosi,splenect, osteoporoso	vitD antidepress	3	11322	2014-12-30	742	3283	0.226013	1	0.9	151	38	83	146	987	4571	0.215926	1	1.13	146	29	89	140	1225	4677
18	TDF			RAL	32	TRU+RAL	ETERO	NO	2006-02-14	9.42192	47.8667	2011-08-10	4	94.5667	2007-10-09						1			cdis	cefalea	indoxen	1	56822	2015-07-16	579	623	0.929374	1	0.66	121	61	100	66	603	630	0.957143	1	0.8	176	51			900	945
19	ABC	RPV			20.965	KIV+RPV	ALTRO	HCV	2008-09-09	6.27123	38.3667	2011-10-22	3	76.3	2008-09-09	1		1			1	1		aes	HCV BPCO ipert osteoporosi neuropat	vitD diuret antidol	3		2014-12-16	416	554	0.750903	1	0.7	158	53	77	136	442	436	1.01376	1	0.71	197	96	75	130	577	704
20			ATV	DTG	38.3	DTG+ATV/rtv	OMO	NO	1988-11-09	26.7123	7.23333	2014-12-16	7	42.0333	2012-02-06			1						lab	ipert	dilatrend triatec vitD	3	12680	2015-07-21	947	631	1.50079	1	1.37	185	46	121	87	947	631	1.50079	1	1.37	185	46	121	87	990	663
21	TDF		ATV		26.559	TRU+ATV/rtv	ETERO	NO	2011-07-05	4.07123	34.8667	2012-09-17	2	8.66667	2014-11-12						1			lab	depress	depakin vitD	2	786700	2015-07-30	339	736	0.460598	49	1.34	217	38	154	123										483	969
22	ABC	NVP			19.543	KIV+NVP	ETERO	NO	2007-06-07	7.96164	87.9667	2008-02-29	3	92.7	2007-10-10	1					1			aes	ipert neropat depress	valsartan antidol	2	500000	2015-05-22	591	1090	0.542202	1	0.79	154	29	93	159	684	1314	0.520548	4	0.8					655	1035
23	TDF	EFV			21.78	ATRIPLA	ETERO	NO	1993-03-12	22.3014	64.8333	2010-02-26	6	64.8333	2010-02-26			1						aes	ipertensione	triatec	1		2015-06-25	999	556	1.79676	15	0.72	190	42	83	152	1089	590	1.84576	7	0.66					1036	595
24	TDF	NVP			20.9	3TC+TDF+NVP	TD	HCV	1993-12-03	21.8137	130.133	2005-01-12	6	147.633	2003-08-06	1		1			1	1		cdis	psicosi osteoporosi IMA HCV	zyprexa EN ASA vitD	4		2015-09-21	329	811	0.405672	1	0.78	200	69	122	183	431	1240	0.347581	1	0.94					672	1877
25	AZT	NVP			14.026	COM+NVP	ETERO	NO	1998-08-25	16.6521	95.6333	2007-06-08	5	202.6	1998-08-25			1			1		1	aes	ipert emicrania	vitD antipert maxalant	4	14250	2015-04-16	671	538	1.24721	1	0.77	178	73	91	70	793	617	1.28525	1	0.9					879	612
26	ABC			RAL	27.92	KIV+RAL	ETERO	NO	2003-05-28	11.7726	43.4	2011-08-09	3	82.3333	2008-05-28	1					1		1	aes	TIA ernia iatale osteopor	vitD ASA	2	500000	2015-03-03	857	810	1.05802	10	0.97	215	65	171	91	1128	950	1.18737	15	1.09	208	71	124	62	1577	903
27	TDF	RPV			21.695	EVIPLERA	ETERO	NO	2012-05-04	2.62466	12.6333	2013-12-04	2	29.9333	2012-07-03			1			1			lab	depress ipertens	antidep planmac vitD	3	216200	2014-12-18	532	896	0.59375	12	1.5	168	30	64	366	240	890	0.269663	10	1.28	195	37	116	210	695	1116
28	TDF	RPV			21.695	EVIPLERA	OMO	NO	2013-12-06	1.64658	20.0333	2013-12-06	1	17.0667	2014-03-05			1						cdis	tiroidect ipertensione	eutirox moduretic	2	13900	2015-07-30	694	824	0.842233	9	0.99	162	45	91	130										753	870
29	TDF	EFV			21.78	ATRIPLA	ETERO	NO	2009-05-11	6.71507	81.7	2009-05-11	1	81.3667	2009-05-21	1							1	lab	osteo Burkitt	vitD	1	112000	2016-01-26	707	964	0.733402	1	1.01	274	71	200	437	642	722	0.889197	1	0.89					685	741
30	TDF	NVP			20.898	TRU+NVP	ETERO	NO	2007-11-26	7.96164	41.7333	2012-06-06	2	94.2	2008-02-14	1								cdis	osteo	vitD	1	39889	2015-11-10	667	1307	0.510329	14	0.79	254	99	132	115	793	1200	0.660833	7	0.8					956	1885
31	ABC	EFV			20.421	KIV+EFV	ETERO	NO	2010-09-24	4.38904	13.0333	2014-01-17	2	53.4	2010-09-24					1				lab ddi	dislip	crestor omega3	2	15190	2015-02-12	321	266	1.20677	1	0.83	190	34	142	197	583	323	1.80495	1	1.01	182	31	129	109	517	293
32	ABC		DRV		26.55	KIV+DRV4/rtv	ETERO	NO	1997-05-15	18.7205	18.2667	2014-07-30	5	79.7	2009-07-13			1		1	1		1	lab	ipert, dismet, parkinson	tavor deursil ppi vitD largactil serenase norvasc cipralex	7		2016-01-29	1417	534	2.65356	1	0.78	279	49	174	277	1657	661	2.50681	7	0.94	255	46	168	201
33	ABC	NVP			19.543	KIV+NVP	ETERO	NO	1997-06-26	17.7178	80.5667	2008-07-28	3	105.433	2006-07-13	1		1						aes	diabete iperT	repaglinide covertan lobidiur cardirene	4		2015-03-11	509	615	0.827642	1	1.13	225	62	138	121	549	573	0.958115	1	1.38	151	48	85	90	634	638
34	TDF		ATV		26.559	TRU+ATV/rtv	OMO	NO	2012-10-07	2.96712	35.3333	2012-10-30	2	35	2012-11-09	1							1	cdis lab	oligoartrite osteop psoriasi	vitD indoxen salazopirina	3	108500	2015-09-25	974	1598	0.609512	33	1.39	197	41	131	123	1064	1494	0.712182	10	1.36					1180	1563
35	TDF			EVG	26	STRIBILD	TD	HCV	1995-06-19	20.5041	12.1333	2014-12-16	7	83.8	2009-01-26	1					1	1		cdis	psicosi osteoporosi HCV cirrosi	luvion ppi konakion felison delorazepan vitD	6		2015-12-15	174	227	0.76652	14	0.78					223	271	0.822878	6	0.84					184	226
36	TDF	RPV			21.695	EVIPLERA	TD	HCV	1997-07-08	17.9397	21.9333	2013-08-23	3	173.433	2001-03-14		1	1				1		cdis	IRC embolia polm HCV	coumadin vitD	2		2015-06-12	1147	1589	0.721838	1	1.42	190	32	57	137	1394	1649	0.845361	1	1.34					1644	1722
37	TDF		LPV		26.548	TRU+LPV/rtv	ETERO	NO	2011-08-29	3.61096	41.9333	2011-10-28	4	42.6667	2011-10-06	1								cdis	osteopenia	vitD	1	45000	2015-04-08	1232	674	1.82789	1	0.68	174	46	106	108										751	782
38	TDF	EFV			21.777	ATRIPLA	ETERO	NO	2004-11-15	10.6247	129.267	2004-11-15	1	114.8	2006-01-23									lab			0	41386	2015-06-29	912	872	1.04587	20	1.36	197	73	106	90				14	1.11					818	929
39	TDF		ATV		26.559	TRU+ATV/rtv	OMO	NO	2012-02-08	3.38904	40.4667	2012-03-02	2	42.3667	2012-01-05	1								cdis	osteoporosi	vitD	1	52340	2015-06-29	717	769	0.93238	1	0.95	144	26	92	130										1088	1084
40	ABC	EFV			20.421	KIV+EFV	OMO	NO	2001-03-25	14.5068	32.6333	2013-01-17	2	175.067	2001-05-07			1		1				aesddi	ipert dislip	vitD rosuv tareg	3	500000	2015-09-23	413	777	0.531532	20	0.88	194	53	109	157	528	1141	0.462752	13	1.06					662	1197
41	ABC			DTG	29.78	KIV+DTG	TD	HCV	1990-06-02	25.6658	12.7333	2015-01-08	8	13.6667	2014-12-11	1		1				1		aes	iperteso ostep HCv	vit D amlodipina	2		2016-01-25	631	771	0.818418	20	0.75	185	45	131	114	1138	824	1.38107	4	0.84					1198	747
42	TDF	EFV			21.777	ATRIPLA	ETERO	NO	2009-08-14	5.34521	65.0333	2009-08-14	1	63.7	2009-09-23				1					cdis	diabete	insulina metform vitD	3	44075	2014-12-17	1056	579	1.82383	7	0.53	165	35	76	268	1308	646	2.02477	1	0.55					1082	905
43	ABC	NVP			19.543	KIV+NVP	OMO	NO	1997-04-28	18.5479	110.4	2006-10-16	6	213.733	1998-04-21	1		1						aes	ipert osteoporosi	triatec vitD	2		2015-11-10	449	779	0.57638	1	0.9	210	45	159	178	477	941	0.506908	1	0.95					594	1064
44	ABC	NVP			19.543	KIV+NVP	TD	NO	2007-04-10	8.61644	49.0333	2011-11-09	2	101.033	2007-08-02								1	lab	artrite reumatoide	plaquenil medrol ppi	3	500000	2015-11-19	459	1734	0.264706	1	0.93	277	51	188	189	446	1935	0.230491	1	0.95					497	1945
45	TDF			EVG	26	STRIBILD	ALTRO	NO	2007-12-20	6.87671	10.6	2013-12-20	2	14.3667	2013-08-29		1							cdis	IRC	vitD	1	265960	2014-11-03	673	1169	0.575706	9	1.31	208	54	135	93	590	1011	0.583581	1	1.26	216	67	134	71	669	1120
46	TDF	EFV			21.78	ATRIPLA	OMO	NO	2010-06-16	5.62466	68.4333	2010-06-16	1	67.4333	2010-07-16		1						1	cdis	IRC carcinoma cute	vitD	1	8230	2016-01-29	950	1128	0.842199	1	1.37	185	35	98	149										931	1140
47	AZT		ATV		14.96	COM+ATV/rtv	ETERO	NO	2012-06-25	2.61644	31.3667	2012-07-09	2	33	2012-05-21									lab			0		2015-02-05	630	512	1.23047	1	1.11	200	52	147	178	595	592	1.00507	1	0.97	199	66	126	61	770	592
48	TDF	EFV			21.777	ATRIPLA	ETERO	NO	2003-10-13	11.6685	107.6	2006-08-09	2	118.1	2005-09-28			1		1				ddi	IMA	ramipril bisoprololo prava asa vitD	5	100688	2015-06-11	540	409	1.32029	1	0.83	206	55	98	263										592	478
49	TDF			RAL	32	TRU+RAL	ETERO	NO	1993-09-07	22.3397	32.9	2013-04-22	7	90.9333	2008-07-16			1	1		1			cdis	ipert ictus diabet	insul met ppi gabapentin escilatopram valsartan deursil torvast	8		2016-01-04	757	458	1.65284	1	0.58	136	33	69	169	927	706	1.31303	11	0.81	150	38	81	151	721	530
50			ATV	RAL	35.028	3TC+ATV+RAL	TD	NO	1996-11-27	18.3041	3.86667	2014-11-18	5	107.367	2006-05-19						1		1	ddi	sarcoidosi, neuropatia demiel	vitD, omepraz, deltacortene	3		2015-03-14	530	239.7	2.2111	1	0.86	202			65	448	191.9	2.33455	1	0.76	156	49	82	71	157	78
51		ETR	DRV		25.646	DRV/r+ETR	OMO	NO	2008-01-15	7.29315	36.8333	2012-04-20	1	52.4667	2011-01-07	1			1	1	1			ddi	diab I, osteoporosi, depres, dist.pers.	atorvastatina, insulina	2	226358	2015-04-30	377	640.8	0.588327	1	0.85	224	38	162	139	529	893.8	0.591855	1	0.85	184			211	645	1047
52		ETR		RAL	30.566	ETR+RAL	ETERO	NO	1996-04-18	19.1123	12.6	2014-05-12	1	66.9333	2009-11-24	1	1	1		1				ddi	IRC, osteoporosi, dislip, ipert	atorvastatina, vitD, cardioASA	3		2015-05-25	400	153.3	2.60926	1	1.46	102	65	33	73	484	276	1.75362	1	1.7	96	51	43	63	621	337
53	ABC	EFV			20.421	KIV+EFV	ETERO	NO	2005-02-25	10.2356	35.4	2012-06-22	1	117.8	2005-09-15					1				ddi	dislip	atorvastatina	1		2015-05-20	763	951.2	0.802145	1	0.79	143			79	968	1247.4	0.776014	1	1.16	196	68	123	61	972	1150
54			DRV	RAL	36.638	DRV+RAL	ETERO	NO	1997-02-14	18.3479	28.7	2013-02-06	3	29.2	2013-01-22			1						cdis	ipert	antiipert	2		2015-06-17	114	1438.1	0.0792713	40	0.78	161			77										143	1754
55	TDF	RPV			21.695	EVIPLERA	OMO	NO	2009-01-07	6.32329	6.53333	2014-10-20	1	7.13333	2014-10-02	1		1						cdis lab	osteopenia, ipert	vitD, ramipril	1	286523	2015-05-04	595	411	1.44769	1	0.8	151	30	105	117	640	411.8	1.55415	1	0.81	195	33	145	113	632	448
56	TDF	EFV			21.777	ATRIPLA	ETERO	NO	2003-12-04	11.4822	133.867	2004-05-27	1	137.867	2004-01-28			1			1			aes	cardiop dilat, FA paross, insonnia	lansopraz, cardioASA, ramipril, lorazepam, trazodone	5	81677	2015-05-26	353	201.6	1.75099	1	0.63	170			99	301	180	1.67222	1	0.83	152	60	76	74	342	117
57	ABC		ATV		30.051	KIV+ATV	TD	HCV	1991-07-01	24.4219	37.1667	2012-11-06	8	37.1667	2012-11-06	1								lab	Osteopenia		0	42698	2015-11-26	851	1109	0.767358	1	0.94	300	47		338	876	990	0.884848	1	1.16	285	47	179	268	882	921
58	TDF	EFV			12.59	TDF+3TC+EFV	ETERO	NO	1996-08-22	19.5562	79.2667	2009-09-03	6	123.167	2006-01-25									lab			0	55020	2016-03-08	737	648	1.13735	1	0.99	194	38	111	144	903	1001	0.902098	1	1.13	187	40	106	160	912	952
59	ABC				43.38	KIV/MVC	OMO	NO	2010-08-06	4.58082	48.9667	2011-02-25	3	53.7333	2010-10-05								1	cdis	IPMN pancreatico	vitD, profilassi con Bactrim	2	17570	2015-03-05	121	295	0.410169	1	1.15	168	59		38	295	236	1.25	1	1.11	165	60		49	138	285
60	ABC	EFV			20.421	KIV+EFV	ETERO	NO	2005-03-16	10.4493	113.167	2006-05-09	5	94.0333	2007-12-04									ddi	NO	statina	1	500001	2015-08-25	883	1472	0.599864	1	0.86	266	65		94	871	1629	0.534684	1	0.89	248	63	148	73	770	1454
61	ABC	NVP			19.543	KIV+NVP	ETERO	NO	1999-01-14	17.1068	105.467	2007-06-21	5	207.033	1999-02-16					1				lab	s.metebolica	statina	1	26607	2016-02-18	932	842	1.10689	1	1.02	284	82	156	140	620	559	1.10912	1	1.06	221	56	129	141	599	601
62	ABC	EFV			20.421	KIV+EFV	OMO	NO	1998-08-16	17.3616	87.5333	2008-10-13	6	88.4667	2008-09-15			1		1				aesddi	pregresso IMA, IA, ipercolesterolemia	statina,antip.,antiaggregante, ASA	5	89640	2015-12-22	498	601	0.828619	1	0.86	172	58		75	389	483	0.805383	1	0.91	134	41		103	402	491
63	ABC		DRV		26.55	KIV+DRV/rtv	ETERO	NO	2008-02-22	7.51507	41.0333	2012-04-13	3	71.8667	2009-10-01	1	1							lab	nefrolitiasi, osteopenia		0	525003	2015-08-27	369	679	0.543446	1	0.94	217	54	134	67	438	879	0.498294	1	1.22	202	68	110	54	415	741
64	ABC	ETR			26.47	KIV+ETR	TD	HCV	1997-02-27	18.526	34.9667	2012-10-19	7	193.433	1999-10-14	1		1						aes	osteopenia, IA	vitD, antipertensivi	3	1999	2015-09-03	485	624	0.777244	39	1.25	168	53		104	451	472	0.955508	1	1.12	175	54	141	93	358	384
65	TDF	EFV			21.78	ATRIPLA	ETERO	NO	1995-03-23	19.9808	76.7333	2008-11-20	8	130.333	2004-06-26	1		1						cdis lab	osteopenia, IA	vitD, antipertensivi	3	80135	2015-03-11	654	415	1.5759	1	0.8	266	51		144	656	434	1.51152	1	1	266	53	130	134	638	472
66	TDF	ETR			27.83	TRU+ETR	OMO	NO	1998-09-11	16.5205	38.9	2012-01-04	6	66.2	2009-10-07	1						1		cdis	epatosteatosi, osteopenia	vitD	1	126810	2015-03-16	1175	1109	1.05951	1	1.11	226	28		163	1101	893	1.23292	1	1	209	32		172	1889	1702
67	ABC		DRV		26.55	KIV+DRV/rtv	TD	HCV	1998-03-09	16.9589	35.7333	2012-03-13	9	36.6333	2012-02-15								1	ddi	asma, S. Gilbert	SIM/SOS12w	2	113400	2015-02-18	676	814	0.830467	1	0.6	229	49		149	576	741	0.777328	1	0.73	176	59		107	456	1180
68	ABC		ATV		26.204	KIV+ATV/r	ETERO	HCV	2000-08-31	15.3973	53.2333	2011-09-06	6	121.967	2006-01-13							1		cdis	epatoèatia CHILD A5 MELD 8, colelitiasi		0	92000	2016-01-20	1588	411	3.86375	1	1	155	42		104	1516	1117	1.35721	1	1.06	176	39	96	168	1537	1096
69	TDF	EFV			21.78	ATRIPLA	OMO	NO	2008-03-10	7.65479	75.7667	2009-08-13	3	89.9	2008-06-15								1	cdis	gastrectomia per LNH gastrico	vitB12	1	6582	2015-11-03	474	703	0.674253	1	1.08	156	43		63	349	593	0.588533	1	1.06	142	37	88	74	377	701
70	ABC		DRV		26.55	KIV+DRV/rtv	ETERO	NO	2012-03-14	2.93425	35.7	2012-03-14	2	36.6333	2012-02-15								1	ddi	Asma allergica, S.di Gilbert	Antiasmatici, corticosteroidi areosol	2	16499	2015-02-18	676	814	0.830467	1	0.6	229	49		172	576	741	0.777328	1	0.73	176	59		82	724	740
71	TDF		APV		23	fAPV/rt+TDF+3TC	OMO	HCV	2010-10-16	4.40548	75.9333	2008-12-15	7	91.8	2007-08-27		1		1			1		cdis	DM, IRC III stadio, cirrosi CHILD B9	insulina, diuret, IPP	4	71297	2015-03-12	223	357	0.62465	1	1.17	170	45		111	297	426	0.697183	1	1.09	167	38		94	298	562
72	TDF	EFV			21.78	ATRIPLA	TD	HCV	2004-03-29	10.9589	77.9667	2008-10-15	6	135.433	2004-01-26						1	1	1	aes	Colelitiasi, epatosteatosi, ictus emorragico traumatico	UDCA	1	2027380	2015-03-12	594	372	1.59677	1	0.89	197	59		79	491	358	1.37151	1	0.91	195	55		111	462	383
73			DRV		43.39	MCV+DRV/rtv	OMO	NO	2007-04-12	8.3863	9.93333	2014-11-04	4	101.167	2007-05-08	1								lab	osteopenia		0	9000	2015-08-29	490			1	1.25	254	51	117	117	709	511	1.38748	1	1.03	279	51	183	159
74	TDF		DRV		27.91	TRU+DRV/r	OMO	NO	2014-11-14	0.967123	11.7667	2014-11-14	2	12.5	2014-10-23	1					1			cdis	s. ansioso-depressiva, osteopenia	antidepressivi, vitD	3	857200	2015-11-02	723	1235	0.585425	1	0.72	167	35		158				1	0.85	161	50	98	93	738	1163
75	ABC				9.68	TZV	TD	NO	2002-06-03	13.1808	158.933	2002-07-16	8	158.933	2002-07-16	1		1		1		1		aes	epatosteatosi, dislipidemia, cardipatia ipocinetica, osteopenia	Statina, BB, IPP, ASA	4	23236	2015-08-05	1348	527	2.55787	1	0.63	149	57		50	1344	497	2.70423	1	0.65	159	61	87	54	1484	473
76	ABC		ATV		26.204	KIV+ATV/r	TD	NO	1996-04-29	18.9726	31.1	2012-09-24	9	126.533	2004-11-22		1		1					aes	DM, IRC III stadio	ipoglicemizzante	2	68510	2015-04-15	970	808	1.2005	1	0.71	230	72		113	1149	1006	1.14215	1	0.85	211	65		68	1071	1077
77	AZT	NVP			14.026	COM+NVP	ETERO	HCV	1999-01-19	16.6658	202.767	1999-01-19	2	181.167	2000-10-28							1		ddi	Epatopatia CHILD A5 MELD 8, colelitiasi	SOF/DAC	2	35962	2015-09-15	1267	891	1.422	1	0.71	94	30		57	662	410	1.61463	1	0.75	98	28		76	584	363
78	ABC		DRV		26.55	KIV+DRV/r	TD	HCV	1997-04-01	18.1068	14.7667	2014-02-17	7	67.9667	2009-10-05							1	1	lab	GERD, cirrosi	statina	1	18169	2015-05-06	1232	941	1.30925	1	0.63	268	26		526	1061	618	1.71683	1	0.79	209	32		116	1180	731
79	TDF	NVP			20.9	3TC+TDF+NVP	ETERO	NO	1998-08-26	16.7836	143.8	2003-08-12	7	204.2	1998-08-26			1		1		1	1	cdis	IA,MGUS, s.metabolica, epatosteatosi, struma	antipert, BB	3	3490	2015-06-04	850	892	0.952915	1	0.87	195	37		120	986	929	1.06136	1	1.02	201	38		102	930	814
80	ABC	NVP			19.543	KIV+NVP	TD	HCV	1998-09-25	16.4137	15.7333	2013-11-04	7	192.333	1999-05-04									lab		IPP, statina	2	6253	2015-02-19	1195	866	1.37991	1	0.71	263	38	128	350	904	609	1.4844	1	0.65	265	40	148	259	887	1358
81			DRV		43.39	MVC+DRV/rtv	ETERO	NO	2011-12-19	3.72329	16.1333	2014-05-12	5	44.3	2012-01-18							1		lab	epatosteatosi	iporuricemizzante	1	517634	2015-09-08	586	1148	0.510453	1	1.15	265	47	171	174	705	1139	0.618964	1	1.25	249	44	55	168	530	931
82	ABC		ATV		26.204	KIV+ATV/r	ETERO	NO	2013-11-07	1.95068	18.7	2014-04-07	3	22.8	2013-12-05		1							lab	nefrolitiasi	statina	1	13287	2015-10-20	667	1079	0.618165	1	1.01	272	52		166	920	1376	0.668605	1	1.15	225	55	110	93	785	995
83	ABC	EFV			20.421	KIV+EFV	ETERO	HCV	2005-06-15	9.99452	84.5667	2008-06-30	5	104.5	2006-11-10			1			1			aes	cardiopatia ischemica, depressione	BB, ASA, antiaggr.	3	309000	2015-06-11	2407	1488	1.61761	1	0.74	161	54	74	197	2054	1537	1.33637	1	0.79	109	38		134	2482	1517
84	ABC		DRV		26.55	KIV+DRV/rtv	TD	NO	1997-03-11	18.0822	5.5	2014-10-23	10	14.8	2014-01-17			1				1		cdis	IA, cirrosi CHLD A5	antipert., ipouricemizzante	3	51000	2015-04-06	1017	767	1.32595	1	1.11	207	37		411	661	447	1.47875	1	1.21	162	36		107	1277	1103
85	TDF	EFV			21.78	ATRIPLA	OMO	NO	2009-05-07	5.92603	69.3	2009-07-30	3	73.2333	2009-04-03	1								cdis	osteopeniia	vitD	1	152369	2015-04-09	697	1249	0.558046	1	0.8	205	36		122	623	1268	0.491325	1	0.96	252	47		117	642	1142
86			DRV	RAL	27.93	RAL+DRV/rtv	OMO	NO	2013-05-20	1.94521	23.6667	2013-05-20	2	22.6333	2013-06-20									lab			0	1659319	2015-04-30	277	2213	0.125169	1	0.83	186	24		218	306	1799	0.170094	1	0.93	186	35		148	320	1568
87	TDF			DTG	26.6	DTG+TDF+3TC	TD	HCV	1998-06-20	16.6603	13.1667	2014-01-13	7	22.8667	2013-03-28							1		cdis	epatosteatosi		0	173994	2015-02-12	948	2366	0.400676	1	0.78	189	51		47	786	1865	0.421448	1	0.87	197	49		49	823	1713
88	ABC				9.68	TZV	ETERO	NO	2005-10-18	9.39726	99.5667	2007-01-04	3	112.967	2005-11-28									aes			0	4033	2015-03-10	756	751	1.00666	1	0.87	213	44		110	756	751	1.00666	1	0.88	222	41		109	918	737
89	TDF	EFV			21.78	ATRIPLA	TD	HCV	2006-01-12	9.73699	27.9	2013-06-21	4	5.8	2015-04-15							1		ddi	epatosteatosi	buprenorfina	1	43929	2015-10-06	635	913	0.695509	1	0.8	115	46		34	893	1971	0.45307	1	0.76	119	41		55	471	649
90	TDF	EFV			21.78	ATRIPLA	ETERO	NO	1998-01-14	17.0904	47.6333	2011-03-16	5	46.6333	2011-04-15					1		1		lab	s.metabolica, epatosteatosi	statina	1	16440	2015-02-12	1172	643	1.82271	1	0.66	273	43		181				1	0.7	242	38	174	206	994	539
91	ABC	EFV			20.421	KIV+EFV	ETERO	NO	2004-12-13	10.189	84.5333	2008-03-10	5	123.5	2004-12-27	1								lab	osteopenia	vitD	1	7371	2015-02-18	1124	1337	0.840688	1	0.89	253	55		95	874	983	0.889115	1	0.91	216	52		58	714	878
92	ABC	EFV			20.421	KIV+EFV	ETERO	NO	2004-09-30	10.7178	90.5667	2008-01-08	4	127.6	2004-12-23			1				1	1	aes	epatosteatosi,psoriasi, IA	antipertensiva	2	88771	2015-06-17	944	489	1.93047	1	0.96	208	34		141	907	527	1.72106	1	0.94	156	31	106	137	690	391
93	TDF	NVP			20.9	3TC+TDF+NVP	ETERO	HCV	2000-12-05	14.4411	15.3667	2014-02-05	10	162.8	2001-12-27			1			1			cdis	cardiopatia ischemica, depressione	antip., asa, antidep, vitD,BB, IPP	7	14720	2015-05-12	500	489	1.02249	1	0.66	206	47		178	504	232	2.17241	1	0.86	134	39	71	29	658	280
94	TDF			DTG	26.6	DTG+TDF+3TC	TD	HCV	1997-06-06	17.6795	12.2	2014-02-04	9	153.067	2002-07-11			1			1			cdis	cardiopatia ischemica, depressione	antip., asa,	3	21000	2015-02-05	1027	1437	0.714683	1	0.81	118	27		118	1209	1552	0.778995	1	0.88	102	31	54	66	1078	1137
[truncated: 12 more columns]
